# Supplementary material for: Molecular subclasses of preeclampsia characterized by a longitudinal maternal proteomics study: distinct biomarkers, disease pathways and options for prevention
Source: publisher site journal article supplement (doi:10.1515/jpm-2022-0433), 2022-10-17
Supplement: Supplementary file 1 [file j_jpm-2022-0433_suppl_002.xlsx]

## Sheet: Top 15 discriminative features
8–15.9 weeks	16–19.9 weeks	20–23.9 weeks	24–27.9 weeks	28–31.9 weeks
Lamin-B1	Heparin-binding EGF-like growth factor	Adapter molecule crk	Cytokine receptor common subunit gamma	Luteinizing hormone
Receptor-type tyrosine-protein kinase FLT3	Platelet factor 4	Ubiquitin-fold modifier-conjugating enzyme 1	Apolipoprotein D	Fibroblast growth factor 16
Cytokine receptor common subunit gamma	Proliferation-associated protein 2G4	Ubiquitin-fold modifier 1	Prostaglandin G/H synthase 2	Cadherin-2
Luteinizing hormone	Amyloid beta A4 protein	Nascent polypeptide-associated complex subunit alpha	Ephrin-A5	Ubiquitin-conjugating enzyme E2 L3
AT-rich interactive domain-containing protein 3A	Interferon gamma	Angiopoietin-1	Complement C4b	Cathepsin E
Mitogen-activated protein kinase 1	Junctional adhesion molecule C	Proteasome subunit alpha type-6	Calcineurin subunit B type 1	Interferon gamma
Ectonucleoside triphosphate diphosphohydrolase 3	Alpha-soluble NSF attachment protein	Small glutamine-rich tetratricopeptide repeat-containing protein alpha	Superoxide dismutase [Cu-Zn]	Cytokine receptor common subunit gamma
Amphiregulin	Amphiregulin	Thrombospondin-1	Ubiquitin-fold modifier-conjugating enzyme 1	Amphiregulin
Fibroblast growth factor 4	Ribosomal protein S6 kinase alpha-3	Protein NOV homolog	NSFL1 cofactor p47	Elongation factor 1-beta
Ribosome maturation protein SBDS	Natural cytotoxicity triggering receptor 3	Histone acetyltransferase KAT6A	Heat shock protein HSP 90-alpha/beta	Desert hedgehog protein N-product
Interferon gamma	Translationally-controlled tumor protein	Amyloid beta A4 protein	VPS10 domain-containing receptor SorCS2	Fibroblast growth factor 7
Apoptosis regulator Bcl-2	Eukaryotic translation initiation factor 4 gamma 2	Complement component C6	Kallikrein-14	Ribosomal protein S6 kinase alpha-5
Pyridoxal phosphate phosphatase	Carbohydrate sulfotransferase 15	Junctional adhesion molecule C	Alpha-soluble NSF attachment protein	Pyridoxal phosphate phosphatase
Ubiquitin-conjugating enzyme E2 L3	Stress-induced-phosphoprotein 1	SPARC	Ubiquitin-conjugating enzyme E2 L3	Proteasome subunit alpha type-6
Ribosomal protein S6 kinase alpha-5	Mitogen-activated protein kinase 14	Caspase-3	Testican-1	Methionine aminopeptidase 2
