# Supplementary material for: Molecular subclasses of preeclampsia characterized by a longitudinal maternal proteomics study: distinct biomarkers, disease pathways and options for prevention
Source: publisher site journal article supplement (doi:10.1515/jpm-2022-0433), 2022-10-17
Supplement: Supplementary file 2 [file j_jpm-2022-0433_suppl_003.xlsx]

## Sheet: 8-15.9 weeks
Cluster	Protein name	log2 fold change	p value	q value
1	C-C motif chemokine 16	0.664654	0.000512853	0.0457501
1	TATA-box-binding protein	0.669998	0.00144595	0.0731191
1	Leucine-rich repeat transmembrane neuronal protein 1	0.588088	0.00817101	0.15247
1	Hepcidin	0.615884	0.0318809	0.203107
1	Prothrombin	0.964057	0.0338096	0.210424
2	Matrilysin	0.589027	4.27681e-08	3.30481e-05
2	Peptidyl-prolyl cis-trans isomerase D	0.835438	2.34204e-05	0.00603252
2	von Willebrand factor	0.777889	0.00113481	0.0684337
2	Complement C4b	-0.719272	0.00602794	0.14703
2	Integrin alpha-IIb: beta-3 complex	0.807935	0.0132762	0.250218
2	Protein-tyrosine kinase 6	-0.59676	0.0145347	0.261194
2	Phosphoglycerate mutase 1	-1.06913	0.0243757	0.303627
2	cAMP-dependent protein kinase catalytic subunit alpha	-0.667742	0.0280332	0.306363
2	Glutathione S-transferase A3	0.732969	0.0305185	0.306363
2	Interleukin-4 receptor subunit alpha	0.717889	0.0309303	0.306419
3	Mitogen-activated protein kinase 13	0.876195	0.000333601	0.0796093
3	von Willebrand factor	0.587331	0.00734129	0.412211
3	Tyrosine-protein kinase Fer	0.587969	0.00883608	0.421722
3	Tyrosine-protein kinase Fyn	0.587103	0.0178346	0.587033
4	Matrilysin	0.796883	5.68399e-15	4.03047e-12
4	Peptidyl-prolyl cis-trans isomerase D	1.20677	2.5113e-10	8.9037e-08
4	Methionine aminopeptidase 1	0.936665	2.47021e-09	4.37902e-07
4	Tyrosine-protein kinase Tec	0.633638	7.46803e-09	9.13975e-07
4	GTP-binding nuclear protein Ran	1.00779	7.73364e-09	9.13975e-07
4	Phosphatidylinositol 4,5-bisphosphate 3-kinase catalytic subunit alpha isoform:Phosphatidylinositol 3-kinase regulatory subunit alpha complex	0.592473	8.9804e-06	0.000636792
4	Tyrosine-protein kinase Fer	0.746866	1.64625e-05	0.000897956
4	Integrin alpha-IIb: beta-3 complex	1.28985	1.90172e-05	0.00096321
4	Thrombospondin-1	0.628164	0.000229326	0.00855857
4	Prostaglandin G/H synthase 2	0.762109	0.000283607	0.00957635
4	Heat shock 70 kDa protein 1A/1B	-0.644644	0.00311256	0.0344858
4	Cyclin-dependent kinase inhibitor 1B	0.758783	0.00392086	0.0397178
4	Complement C4b	-0.848738	0.00469758	0.0444135
4	Low molecular weight phosphotyrosine protein phosphatase	0.589799	0.00755018	0.0622531
4	Protein-tyrosine kinase 6	-0.6133	0.0223486	0.126744
4	Serum amyloid A-1 protein	-1.83935	0.0251734	0.13321

## Sheet: 16–19.9 weeks
Cluster	Protein name	log2 fold change	p value	q value
1	Matrilysin	0.790173	1.30117e-06	0.00108825
1	Inhibin beta A chain	0.761743	0.000110665	0.0110473
1	Ribosome maturation protein SBDS	-0.589451	0.000248946	0.0139516
1	Calcineurin	-0.610485	0.0002669	0.0139516
1	Sphingosine kinase 1	-0.663761	0.000318429	0.015666
1	ICOS ligand	-0.660171	0.000777767	0.0216832
1	Gro-beta/gamma	-0.608869	0.000960464	0.0226023
1	C-type lectin domain family 1 member B	-0.651657	0.00164979	0.0289219
1	Serine/threonine-protein kinase PAK 6	-0.765295	0.00239341	0.0335132
1	Trypsin-2	0.612395	0.00244428	0.0335132
1	Growth-regulated alpha protein	-0.778201	0.00269881	0.0355977
1	Tyrosine-protein kinase Lyn, isoform B	-0.6335	0.0035852	0.0399804
1	Tyrosine-protein kinase Lyn	-0.706642	0.00567541	0.0533338
1	Kallikrein-5	0.734721	0.00979106	0.0718323
1	3-phosphoinositide-dependent protein kinase 1	-0.745335	0.010574	0.0745179
1	Leucine-rich repeat transmembrane neuronal protein 1	0.783235	0.01269	0.0810187
1	Eukaryotic translation initiation factor 4 gamma 2	-0.661743	0.0130312	0.0819459
1	Calcium/calmodulin-dependent protein kinase type II subunit beta	-0.757672	0.0149359	0.0905204
1	Tyrosine-protein kinase Fer	-0.761392	0.0155264	0.0934224
1	cAMP-dependent protein kinase catalytic subunit alpha	-0.67561	0.0158637	0.0934351
1	AMP Kinase (alpha2beta2gamma1)	-0.662643	0.0176205	0.101635
1	Interleukin-1 receptor-like 1	0.932628	0.0185746	0.104263
1	Interleukin-2 receptor subunit alpha	0.690149	0.0211677	0.109962
1	Tyrosine-protein kinase Fyn	-0.899754	0.0243685	0.116242
1	Calcium/calmodulin-dependent protein kinase type II subunit delta	-0.628201	0.0264432	0.121517
1	Immunoglobulin E	1.26247	0.044265	0.165275
2	Matrilysin	0.873214	5.80316e-08	5.32835e-05
2	GTP-binding nuclear protein Ran	0.665725	0.0022251	0.50239
2	Peptidyl-prolyl cis-trans isomerase D	0.679585	0.00888622	0.72373
2	Integrin alpha-IIb: beta-3 complex	1.21053	0.0152244	0.74262
2	beta-nerve growth factor	0.88391	0.0220802	0.74262
2	Glutathione S-transferase A3	0.827359	0.0413769	0.743968
3	Alpha-2-macroglobulin	0.596105	0.00171181	0.586166
3	Lactoperoxidase	0.783439	0.00472933	0.740175
3	Interleukin-2	0.676138	0.00504367	0.740175
3	Macrophage metalloelastase	-0.725965	0.00675407	0.826741
3	Focal adhesion kinase 1	1.02665	0.00965751	0.826741
3	Interferon gamma receptor 1	0.860013	0.011503	0.844051
3	Interstitial collagenase	0.629993	0.0142818	0.888227
3	Protein-glutamine gamma-glutamyltransferase E	1.18162	0.0162036	0.888227
3	Prothrombin	1.63747	0.0244814	0.888227
3	Membrane metallo-endopeptidase-like 1	0.65626	0.0294692	0.888227
3	Histidine triad nucleotide-binding protein 1	0.602813	0.0312199	0.888227
3	Tumor necrosis factor receptor superfamily member 19	0.756051	0.0372046	0.888227
4	Matrilysin	0.815721	4.15796e-10	1.88998e-07
4	GTP-binding nuclear protein Ran	1.06606	1.76872e-07	4.01982e-05
4	Angiopoietin-1	0.813054	9.72729e-07	0.000117427
4	Peptidyl-prolyl cis-trans isomerase D	1.31584	1.03336e-06	0.000117427
4	Platelet-derived growth factor subunit B	0.589634	2.39222e-05	0.00120819
4	Thrombospondin-1	0.694668	4.94862e-05	0.00204488
4	Integrin alpha-IIb: beta-3 complex	1.71437	7.33678e-05	0.00256531
4	Platelet factor 4	0.667876	0.000168577	0.0051084
4	Xaa-Pro aminopeptidase 1	0.594519	0.00102874	0.0137532
4	Methionine aminopeptidase 1	0.762688	0.00154795	0.0175903
4	Placenta growth factor	-0.600594	0.00464872	0.0270158
4	Plasma serine protease inhibitor	-0.593417	0.0076845	0.0363849
4	Fractalkine	-0.65656	0.00921026	0.039126
4	Leukocyte immunoglobulin-like receptor subfamily B member 1	-0.83992	0.00996175	0.0393067
4	Serum amyloid A-1 protein	-1.69482	0.0187999	0.0532528
4	Metalloproteinase inhibitor 3	0.700785	0.0199694	0.0546806
4	Insulin-like growth factor-binding protein 1	-0.703787	0.0211882	0.0562038
4	Vascular endothelial growth factor A, isoform 121	-0.613957	0.0219602	0.057699
4	Phospholipase A2, membrane associated	-0.891479	0.025563	0.0626431
4	C-X-C motif chemokine 13	-0.824242	0.0351783	0.075071

## Sheet: 20-23.9 weeks
Cluster	Protein name	log2 fold change	p value	q value
1	Glia-derived nexin	0.741475	3.52477e-08	2.46734e-05
1	Matrilysin	0.902899	8.70816e-08	3.04786e-05
1	Integrin alpha-IIb: beta-3 complex	1.50224	6.77388e-07	0.000158057
1	Plasma serine protease inhibitor	-1.30713	7.55949e-05	0.0105833
1	Tyrosine-protein kinase JAK2	-1.05864	0.000214823	0.0214823
1	Prothrombin	1.49754	0.000426361	0.0271321
1	Inter-alpha-trypsin inhibitor heavy chain H4	-0.656056	0.000964322	0.04778
1	Interleukin-2	0.653371	0.00102386	0.04778
1	Sialic acid-binding Ig-like lectin 6	1.08094	0.00213856	0.0581578
1	Cathepsin E	1.87998	0.00249882	0.0614439
1	Eukaryotic translation initiation factor 4 gamma 2	0.691675	0.00268849	0.0627315
1	Peptidyl-prolyl cis-trans isomerase F, mitochondrial	0.676441	0.0035031	0.0668109
1	NADPH--cytochrome P450 reductase	0.735916	0.00357067	0.0668109
1	C-C motif chemokine 4-like	0.623165	0.00435471	0.0781614
1	GTP-binding nuclear protein Ran	0.631823	0.0197642	0.182972
2	Integrin alpha-IIb: beta-3 complex	1.87949	6.07958e-06	0.00646646
2	Matrilysin	0.661581	0.000108752	0.0578362
2	Serine/threonine-protein kinase receptor R3	0.813856	0.000230777	0.0778581
2	Growth-regulated alpha protein	0.752071	0.000401691	0.0854505
2	Dynein light chain roadblock-type 1	0.585554	0.00124846	0.189701
2	Peptidyl-prolyl cis-trans isomerase D	0.913422	0.00199373	0.21206
2	Complement C4b	-1.12024	0.00283104	0.250933
2	GTP-binding nuclear protein Ran	0.733142	0.00765218	0.361454
2	C-X-C motif chemokine 10	0.624328	0.011128	0.394111
2	Creatine kinase M-type:Creatine kinase B-type heterodimer	0.779037	0.0120851	0.394111
2	Intercellular adhesion molecule 3	0.598474	0.0124446	0.394111
2	Sialic acid-binding Ig-like lectin 6	1.11615	0.0126887	0.394111
2	Prostaglandin G/H synthase 2	0.599568	0.0246644	0.430066
2	3-hydroxyacyl-CoA dehydrogenase type-2	0.752091	0.0264078	0.430713
2	Granzyme H	0.625324	0.0336872	0.451839
2	Homeodomain-interacting protein kinase 3	1.44834	0.0380208	0.451839
2	Tumor necrosis factor ligand superfamily member 4	0.671485	0.0409019	0.451839
2	Glucocorticoid receptor	0.796119	0.0446929	0.451839
3	Matrilysin	0.741924	2.49801e-06	0.0013512
3	GTP-binding nuclear protein Ran	1.19525	1.2103e-05	0.0043644
3	Peptidyl-prolyl cis-trans isomerase D	1.14716	0.000188783	0.0510574
3	Methionine aminopeptidase 1	0.897733	0.000632641	0.0977718
3	Sonic hedgehog protein	0.61786	0.00132173	0.154811
3	Complement C4b	-1.0094	0.00365579	0.283934
3	Thrombospondin-4	0.604999	0.00394035	0.283934
3	Contactin-1	0.595168	0.00418227	0.283934
3	Neurogenic locus notch homolog protein 3	0.773368	0.00432819	0.283934
3	Tyrosine-protein kinase Fer	0.65484	0.00446182	0.283934
3	Creatine kinase M-type:Creatine kinase B-type heterodimer	0.72456	0.00639567	0.337538
3	Phospholipase A2, membrane associated	0.593057	0.0173784	0.508997
3	Low molecular weight phosphotyrosine protein phosphatase	0.638698	0.019082	0.508997
3	Sialic acid-binding Ig-like lectin 6	0.723269	0.0252314	0.584923
3	Cystatin-F	1.20469	0.0416765	0.709508
4	GTP-binding nuclear protein Ran	1.56921	4.97963e-09	2.1345e-06
4	Matrilysin	0.913391	5.39758e-09	2.1345e-06
4	Cyclin-dependent kinase 8:Cyclin-C complex	0.613463	5.10114e-07	0.000100863
4	Integrin alpha-IIb: beta-3 complex	1.35353	4.30767e-06	0.000681395
4	Methionine aminopeptidase 1	0.972288	9.71041e-06	0.00128001
4	Peptidyl-prolyl cis-trans isomerase D	1.25368	1.28245e-05	0.001449
4	Tyrosine-protein kinase Tec	0.591308	0.000178138	0.0176114
4	Integrin alpha-V: beta-5 complex	-0.621351	0.000782717	0.0442184
4	Prostaglandin G/H synthase 2	0.908815	0.00299892	0.107494
4	Heat shock 70 kDa protein 1A/1B	-0.866285	0.0080933	0.168794
4	Complement C4b	-0.863125	0.0123368	0.207602
4	Placenta growth factor	-0.606773	0.0349917	0.25446

## Sheet: 24–27.9 weeks
Cluster	Protein name	log2 fold change	p value	q value
1	Inhibin beta A chain	0.804875	0.0105493	0.421136
1	Sialic acid-binding Ig-like lectin 6	2.41534	0.0119011	0.437095
1	C3a anaphylatoxin	-0.769202	0.0450271	0.459632
2	cAMP-dependent protein kinase catalytic subunit alpha	-0.690898	0.00337318	0.19137
2	Placenta growth factor	-0.610852	0.00700227	0.193082
2	Tyrosine-protein kinase HCK	0.614718	0.00830258	0.193082
2	GTP-binding nuclear protein Ran	0.601776	0.0116306	0.193082
2	Complement C4b	-0.66217	0.0160687	0.234182
3	Tyrosine-protein kinase Fyn	0.800506	6.98312e-05	0.0653874
3	Tyrosine-protein kinase Fer	0.771046	0.000304975	0.106257
3	GTP-binding nuclear protein Ran	0.969631	0.000544705	0.106257
3	3-phosphoinositide-dependent protein kinase 1	0.594845	0.000657874	0.106257
3	Integrin alpha-I: beta-1 complex	0.6438	0.000952081	0.111437
3	Low molecular weight phosphotyrosine protein phosphatase	0.749267	0.00493566	0.170981
3	Placenta growth factor	-0.61781	0.0126513	0.232279
3	Methionine aminopeptidase 1	0.617706	0.036756	0.368543
3	Mitogen-activated protein kinase 13	0.67772	0.0412635	0.379207
4	GTP-binding nuclear protein Ran	0.882163	9.47298e-05	0.0309629
4	Placenta growth factor	-0.86612	0.000653405	0.0448008
4	Sialic acid-binding Ig-like lectin 6	1.86493	0.0045008	0.0782709
4	Methionine aminopeptidase 1	0.757743	0.00450195	0.0782709
4	Peptidyl-prolyl cis-trans isomerase D	0.774572	0.0108019	0.0975226
4	Platelet factor 4	0.603763	0.0133466	0.102908
4	Integrin alpha-IIb: beta-3 complex	0.711377	0.0152119	0.102908
4	Cyclin-dependent kinase inhibitor 1B	0.671703	0.0387656	0.149286

## Sheet: 28–31.9 weeks
Cluster	Protein name	log2 fold change	p value	q value
1	Plasma serine protease inhibitor	-1.11561	6.67193e-05	0.0356566
1	Tyrosine-protein kinase JAK2	-0.78928	0.00133942	0.155251
1	Serine/threonine-protein kinase PAK 6	-0.591433	0.00264645	0.186708
1	Prothrombin	1.14291	0.005603	0.21648
1	Inhibin beta A chain	1.02553	0.00747314	0.241032
1	Glia-derived nexin	0.623776	0.00921345	0.244097
1	Integrin alpha-IIb: beta-3 complex	0.730325	0.010886	0.252357
1	N-acylethanolamine-hydrolyzing acid amidase	0.821027	0.0121264	0.255578
1	Placenta growth factor	-0.725128	0.0189474	0.284004
1	40S ribosomal protein S7	0.753972	0.0189893	0.284004
1	Sialic acid-binding Ig-like lectin 6	2.59409	0.0206966	0.299866
1	Leucine-rich repeat transmembrane neuronal protein 1	0.620629	0.0374143	0.381244
2	GTP-binding nuclear protein Ran	0.814042	0.000925049	0.874914
2	Placenta growth factor	-0.66801	0.0200061	0.874914
2	Integrin alpha-IIb: beta-3 complex	0.87349	0.0357161	0.874914
2	N-acylethanolamine-hydrolyzing acid amidase	0.614705	0.0386609	0.874914
3	Calcium/calmodulin-dependent protein kinase type II subunit delta	0.850752	0.000110098	0.0496851
3	Calcium/calmodulin-dependent protein kinase type II subunit beta	0.801448	0.000158234	0.0496851
3	Tyrosine-protein kinase Fyn	1.10831	0.00017259	0.0496851
3	GTP-binding nuclear protein Ran	0.808277	0.000458741	0.0792371
3	3-phosphoinositide-dependent protein kinase 1	0.701476	0.000576666	0.0830049
3	Tyrosine-protein kinase Fer	0.673772	0.00110485	0.136313
3	Integrin alpha-I: beta-1 complex	0.740767	0.00351425	0.37938
3	Methionine aminopeptidase 1	0.643044	0.00462622	0.381753
3	N-acylethanolamine-hydrolyzing acid amidase	0.653407	0.00483999	0.381753
3	Placenta growth factor	-0.795177	0.0182915	0.561415
4	GTP-binding nuclear protein Ran	1.14534	4.18723e-07	0.000110391
4	Platelet-derived growth factor subunit B	0.690802	5.15185e-06	0.000301826
4	Methionine aminopeptidase 1	0.934486	1.40779e-05	0.000542947
4	Connective tissue-activating peptide III	0.592751	2.41036e-05	0.000747597
4	Vascular endothelial growth factor A, isoform 121	-0.79126	2.83807e-05	0.000786969
4	Calcium/calmodulin-dependent protein kinase type II subunit alpha	0.600517	3.29848e-05	0.000828191
4	Lactotransferrin	-0.584989	5.89546e-05	0.00129521
4	Tyrosine-protein kinase Tec	0.594079	6.6143e-05	0.00139502
4	Calcium/calmodulin-dependent protein kinase type II subunit delta	0.820936	7.16414e-05	0.00142681
4	Neutrophil-activating peptide 2	0.645093	7.7318e-05	0.00142681
4	Tyrosine-protein kinase Fyn	0.808608	0.000126652	0.00190801
4	Calcium/calmodulin-dependent protein kinase type II subunit beta	0.787297	0.000136951	0.00193767
4	Platelet factor 4	0.86624	0.000201565	0.00221416
4	Sialic acid-binding Ig-like lectin 6	1.80252	0.000211564	0.00223104
4	Thrombospondin-1	0.765667	0.000228053	0.00229788
4	Fractalkine	-0.60543	0.00026552	0.00254548
4	Integrin alpha-IIb: beta-3 complex	1.35526	0.000290754	0.00264322
4	3-phosphoinositide-dependent protein kinase 1	0.670341	0.000322491	0.00278755
4	Peptidyl-prolyl cis-trans isomerase D	1.01316	0.000360037	0.00296622
4	Aflatoxin B1 aldehyde reductase member 2	0.601909	0.000432178	0.00329286
4	Placenta growth factor	-1.29726	0.000437156	0.00329286
4	60 kDa heat shock protein, mitochondrial	0.636382	0.000878932	0.00526633
4	Tyrosine-protein kinase Fer	0.722626	0.00110684	0.00618867
4	Angiopoietin-1	0.634266	0.00112677	0.00618867
4	Gro-beta/gamma	0.590438	0.00208201	0.00954703
4	Peptidyl-prolyl cis-trans isomerase F, mitochondrial	0.673793	0.00262724	0.0109689
4	Collagen alpha-1(XXIII) chain	0.90045	0.00294608	0.0115924
4	3-hydroxyacyl-CoA dehydrogenase type-2	0.841392	0.0040546	0.0143482
