# Supplementary material for: Molecular subclasses of preeclampsia characterized by a longitudinal maternal proteomics study: distinct biomarkers, disease pathways and options for prevention
Source: publisher site journal article supplement (doi:10.1515/jpm-2022-0433), 2022-10-17
Supplement: Supplementary file 3 [file j_jpm-2022-0433_suppl_004.xlsx]

## Sheet: Cluster 1
Pathway name	count DE	count All	pv FDR
Glucagon signaling pathway	8	15	0.000815421
Oxytocin signaling pathway	8	25	0.00421907
Platelet activation	6	27	0.00714702
Cholinergic synapse	5	17	0.0113402
Calcium signaling pathway	7	23	0.0113402
Amphetamine addiction	5	11	0.0144091
Human T-cell leukemia virus 1 infection	8	45	0.0587105
Long-term potentiation	5	15	0.0648759
T cell receptor signaling pathway	6	40	0.0821528
Regulation of actin cytoskeleton	4	52	0.0821528
Olfactory transduction	3	6	0.0821528
Longevity regulating pathway - multiple species	4	19	0.0821528
Circadian rhythm	3	7	0.0821528
Insulin signaling pathway	5	24	0.0821528
Kaposi sarcoma-associated herpesvirus infection	8	52	0.0821528
Hypertrophic cardiomyopathy	5	21	0.0821528
Thermogenesis	4	16	0.0821528
Wnt signaling pathway	6	27	0.0821528
Legionellosis	4	17	0.0821528
Apelin signaling pathway	5	20	0.0937688
Parkinson disease	4	22	0.0979157

## Sheet: Cluster 2
Pathway name	count DE	count All	pv FDR
Fluid shear stress and atherosclerosis	3	45	0.0875951
Platelet activation	4	27	0.0875951

## Sheet: Cluster 3
Pathway name	count DE	count All	pv FDR
Platelet activation	7	27	0.00468175
Focal adhesion	10	55	0.00485955
ECM-receptor interaction	6	20	0.00485955
Human papillomavirus infection	8	52	0.0247521
Arrhythmogenic right ventricular cardiomyopathy	4	9	0.0247521
Neuroactive ligand-receptor interaction	1	30	0.0758443
Regulation of actin cytoskeleton	6	52	0.0758443
Dilated cardiomyopathy	4	16	0.0758443

## Sheet: Cluster 4
Pathway name	count DE	count All	pv FDR
Cholinergic synapse	6	17	0.00998827
Pathways of neurodegeneration - multiple diseases	9	66	0.00998827
Calcium signaling pathway	7	23	0.00998827
Amphetamine addiction	5	11	0.00998827
Focal adhesion	10	55	0.0118242
Glucagon signaling pathway	5	15	0.013304
Kaposi sarcoma-associated herpesvirus infection	9	52	0.013304
Prion disease	7	50	0.0133244
Fluid shear stress and atherosclerosis	6	45	0.0133244
B cell receptor signaling pathway	5	19	0.0133244
Wnt signaling pathway	6	27	0.0133244
MicroRNAs in cancer	9	49	0.013649
Cushing syndrome	4	18	0.0158248
T cell receptor signaling pathway	7	40	0.0176188
Alzheimer disease	8	47	0.0176188
Proteoglycans in cancer	10	65	0.0187181
ErbB signaling pathway	6	36	0.0187181
Long-term potentiation	5	15	0.0187181
Platelet activation	5	27	0.0187181
HIF-1 signaling pathway	8	40	0.0187181
Glioma	6	26	0.0192385
Human papillomavirus infection	8	52	0.0217491
Inflammatory mediator regulation of TRP channels	6	26	0.0239666
Oxytocin signaling pathway	6	25	0.0296651
Carbohydrate digestion and absorption	2	3	0.0307518
Rap1 signaling pathway	9	71	0.032111
Gastric acid secretion	3	9	0.032111
VEGF signaling pathway	6	27	0.032111
Parkinson disease	4	22	0.032111
Fc epsilon RI signaling pathway	4	27	0.032111
Human cytomegalovirus infection	8	52	0.032111
Osteoclast differentiation	7	43	0.032111
Legionellosis	4	17	0.0383106
Regulation of lipolysis in adipocytes	3	8	0.0393573
Renal cell carcinoma	4	20	0.0393573
Small cell lung cancer	5	21	0.0408485
Olfactory transduction	3	6	0.0473391
Circadian entrainment	3	11	0.0473391
Oocyte meiosis	5	28	0.0516093
Insulin secretion	3	11	0.0557259
TNF signaling pathway	6	46	0.058838
Dopaminergic synapse	4	17	0.059598
Melanogenesis	3	16	0.0674061
cAMP signaling pathway	5	26	0.0675706
Human T-cell leukemia virus 1 infection	6	45	0.0675706
Axon guidance	8	57	0.0717574
Thyroid hormone signaling pathway	4	23	0.0717574
Chemokine signaling pathway	8	63	0.0799458
Longevity regulating pathway - multiple species	3	19	0.0799458
Neurotrophin signaling pathway	6	39	0.0947886
Pancreatic cancer	3	19	0.0976002
PI3K-Akt signaling pathway	11	128	0.0976002
Chronic myeloid leukemia	3	19	0.0976002
